# Supplementary material
Source: MDPI journal article supplement (https://www.mdpi.com/2227-9040/5/3/24)
Supplement: s1 [file s1]

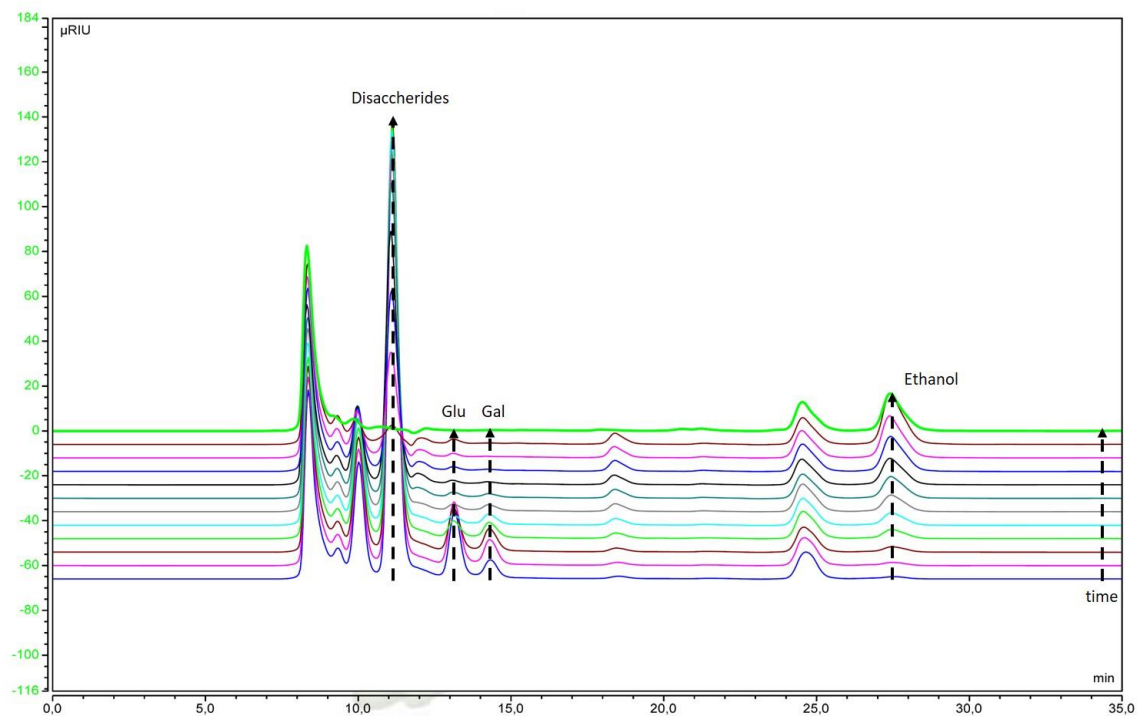

**Figure S1.** HPLC data of the used pilsner malt extract at different time stages. Increase of ethanol is applicable due to late retention time in the chromatogram. Glucose and Galactose are first, afterwards the disaccharides are consumed by the cells. After consumption of all easy accessible sugars, growth on ethanol starts leading to a decrease in ethanol concentration overnight.
